# Supplementary material for: Ru-core/Cu-shell bimetallic nanoparticles with controlled size formed in one-pot synthesis
Source: Royal Society of Chemistry journal article supplement (doi:10.1039/c4nr03666b), 2014-01-01
Supplement: c4nr03666b1.pdf [file c4nr03666b1.pdf]

## Ru-core/Cu-shell bimetallic nanoparticles with controlled size formed in one-pot synthesis

I. Helgadottir<sup>a,b</sup>, G. Freychet<sup>a</sup>, P. Arquillière<sup>a,b</sup>, M. Maret<sup>c</sup>, P. Gergaud<sup>a</sup>, P.H. Haumesser<sup>a</sup> and C.C. Santini<sup>b</sup>

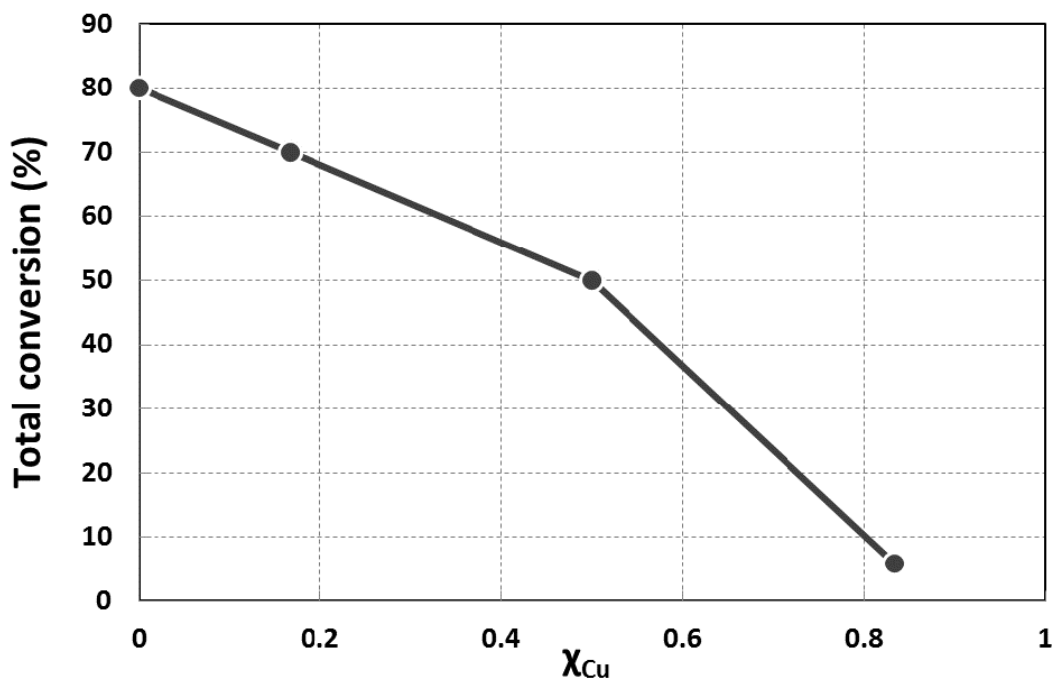

Fig.: Conversion yield of benzene into cyclohexane as a function of molar fraction of Cu in bimetallic RuCuNPs in  $C_1C_4ImNTf_2$  for 4 h at 150°C under 0.9 MPa  $H_2$ .
